# Supplementary material for: Replication fork slowing and stalling are distinct, checkpoint-independent consequences of replicating damaged DNA
Source: PubMed Central journal article supplement (PMC5570505; doi:10.1371/journal.pgen.1006958), 2017-08-14
Supplement: pgen.1006958.s002.pdf [file pgen.1006958.s002.pdf]

## Figure S2: Schematic explanation of stall rate estimation

A

Estimation of apparent stall rate

Apparent stall rate was calculated from the unambiguous stall events (RUG and GUR) as explained in the text.

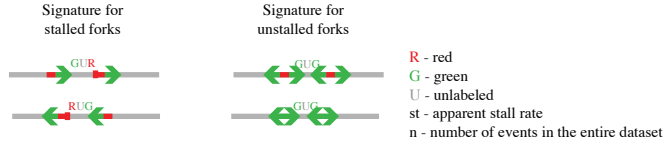

$$st = \frac{n(RUG) + n(GUR)}{n(GUG) + n(RUG) + n(GUR)}$$

The stalled forks are included in the denominator because every stall leads to loss of one fork.

For example, consider an origin (GRG) on a fiber. If one of its fork is stalled then it will appear as GR or RG and we would calculate the stall rate as 50% since one fork is stalled however ideally there should be two (one fork which we can visualize and one which is stalled).

B

Estimation of stall rate from all events - ambiguous as well as unambiguous events

? - ambiguous stall events

|  | Description for the bold-italicized track                                                                           | Probability of the bold-italicized red track having a stalled fork | Probability of the bold-italicized red track being an origin with two stalled forks | Total number of stalled forks                 | Total number of unstalled forks  | Total number of ongoing forks                                                    |
|--|---------------------------------------------------------------------------------------------------------------------|--------------------------------------------------------------------|-------------------------------------------------------------------------------------|-----------------------------------------------|----------------------------------|----------------------------------------------------------------------------------|
|  | red track is an origin with a stalled leftward fork                                                                 | 1                                                                  | -                                                                                   | n(GURG)                                       | n(GURG)                          | 2*n(GURG)                                                                        |
|  | red track could be an origin with a stalled leftward fork or just an elongating rightward fork                      | st                                                                 | -                                                                                   | n(URG)*st                                     | n(URG)*(1-st)                    | n(URG)*(1-st) + 2*st*n(URG)                                                      |
|  | elongating forks from an origin in the center or two origins whose inner forks have stalled                         | st^2                                                               | -                                                                                   | n(RURG)*st^2                                  | n(RURG)*(1-st^2)                 | n(RURG)*(1-st^2) + 2*st^2*n(RURG)                                                |
|  | red track is an origin with a stalled rightward fork                                                                | 1                                                                  | -                                                                                   | n(GRUG)                                       | n(GRUG)                          | 2*n(GRUG)                                                                        |
|  | red track could be an origin with a stalled rightward fork or just an elongating leftward fork                      | st                                                                 | -                                                                                   | n(GRU)*st                                     | n(GRU)*(1-st)                    | n(GRU)*(1-st) + 2*st*n(GRU)                                                      |
|  | elongating forks from an origin in the center or two origins whose inner forks have stalled                         | st^2                                                               | -                                                                                   | n(GRUR)*st^2                                  | n(GRUR)*(1-st^2)                 | n(GRUR)*(1-st^2) + 2*st^2*n(GRUR)                                                |
|  | red track could be an elongating fork with a stalled leftward fork or an origin with two stalls                     | 1-st                                                               | st                                                                                  | n(GURU)*(1-st) + 2*n(GURU)*st                 | -                                | n(GURU)*(1-st) + 2*n(GURU)*st                                                    |
|  | red track could be an elongating fork with a stalled rightward fork or an origin with two stalls                    | 1-st                                                               | st                                                                                  | n(URUG)*(1-st) + 2*n(URUG)*st                 | -                                | n(URUG)*(1-st) + 2*n(URUG)*st                                                    |
|  | red track could be a termination event or an origin with two stalls or an elongating fork with stall on either side | st + st^2 - 2*st^3                                                 | st^3                                                                                | n(RURU)*(st + st^2 - 2*st^3) + 2*n(RURU)*st^3 | 2*n(RURU)*(1 - st - st^2 + st^3) | n(RURU)*(st + st^2 - 2*st^3) + 2*n(RURU)*st^3 + 2*n(RURU)*(1 - st - st^2 + st^3) |
|  | red track could be a termination event or an origin with two stalls or an elongating fork with stall on either side | st + st^2 - 2*st^3                                                 | st^3                                                                                | n(URUR)*(st + st^2 - 2*st^3) + 2*n(URUR)*st^3 | 2*n(URUR)*(1 - st - st^2 + st^3) | n(URUR)*(st + st^2 - 2*st^3) + 2*n(URUR)*st^3 + 2*n(URUR)*(1 - st - st^2 + st^3) |
|  | red track could be a termination event or an origin with two stalls or an elongating fork with stall on either side | 2*(st^2 - st^4)                                                    | st^4                                                                                | 2*n(RURUR)*(st^2 - st^4) + 2*n(RURUR)*st^4    | 2*n(RURUR)*(1 - 2*st^2 + st^4)   | 2*n(RURUR)*(st^2 - st^4) + 2*n(RURUR)*st^4 + 2*n(RURUR)*(1 - 2*st^2 + st^4)      |
|  | red track could be an elongating fork with a stalled rightward fork or could be an origin with two stalls           | 1-st^2                                                             | st^2                                                                                | n(RURUG)*(1-st^2) + 2*n(RURUG)*st^2           | -                                | n(RURUG)*(1-st^2) + 2*n(RURUG)*st^2                                              |
|  | red track could be an elongating fork with a stalled leftward fork or could be an origin with two stalls            | 1-st^2                                                             | st^2                                                                                | n(GURUR)*(1-st^2) + 2*n(GURUR)*st^2           | -                                | n(GURUR)*(1-st^2) + 2*n(GURUR)*st^2                                              |
|  | red track is an origin with both its forks stalled                                                                  | -                                                                  | 1                                                                                   | 2*n(GURUG)                                    | -                                | 2*n(GURUG)                                                                       |
|  | red track could be a termination event or an origin with two stalls or an elongating fork with stall on either side | 2*(st - st^2)                                                      | st^2                                                                                | 2*n(URU)*(st - st^2) + 2*n(URU)*st^2          | 2*n(URU)*(1 - 2*st + st^2)       | 2*n(URU)*(st - st^2) + 2*n(URU)*st^2 + 2*n(URU)*(1 - 2*st + st^2)                |
|  | red track is an origin with two forks                                                                               | -                                                                  | -                                                                                   | -                                             | 2*n(GRG)                         | 2*n(GRG)                                                                         |

$$\text{stall rate} = \frac{\text{total number of stalled forks}}{\text{total number of ongoing forks}}$$

Figure S2: Schematic explanation of stall rate estimation. (A) Estimation of apparent stall rate from unambiguous events. (B) Estimation of stall rate from all events – ambiguous as well as unambiguous events.
