# Supplementary material for: Replication fork slowing and stalling are distinct, checkpoint-independent consequences of replicating damaged DNA
Source: PubMed Central journal article supplement (PMC5570505; doi:10.1371/journal.pgen.1006958), 2017-08-14
Supplement: pgen.1006958.s003.pdf [file pgen.1006958.s003.pdf]

Figure S3

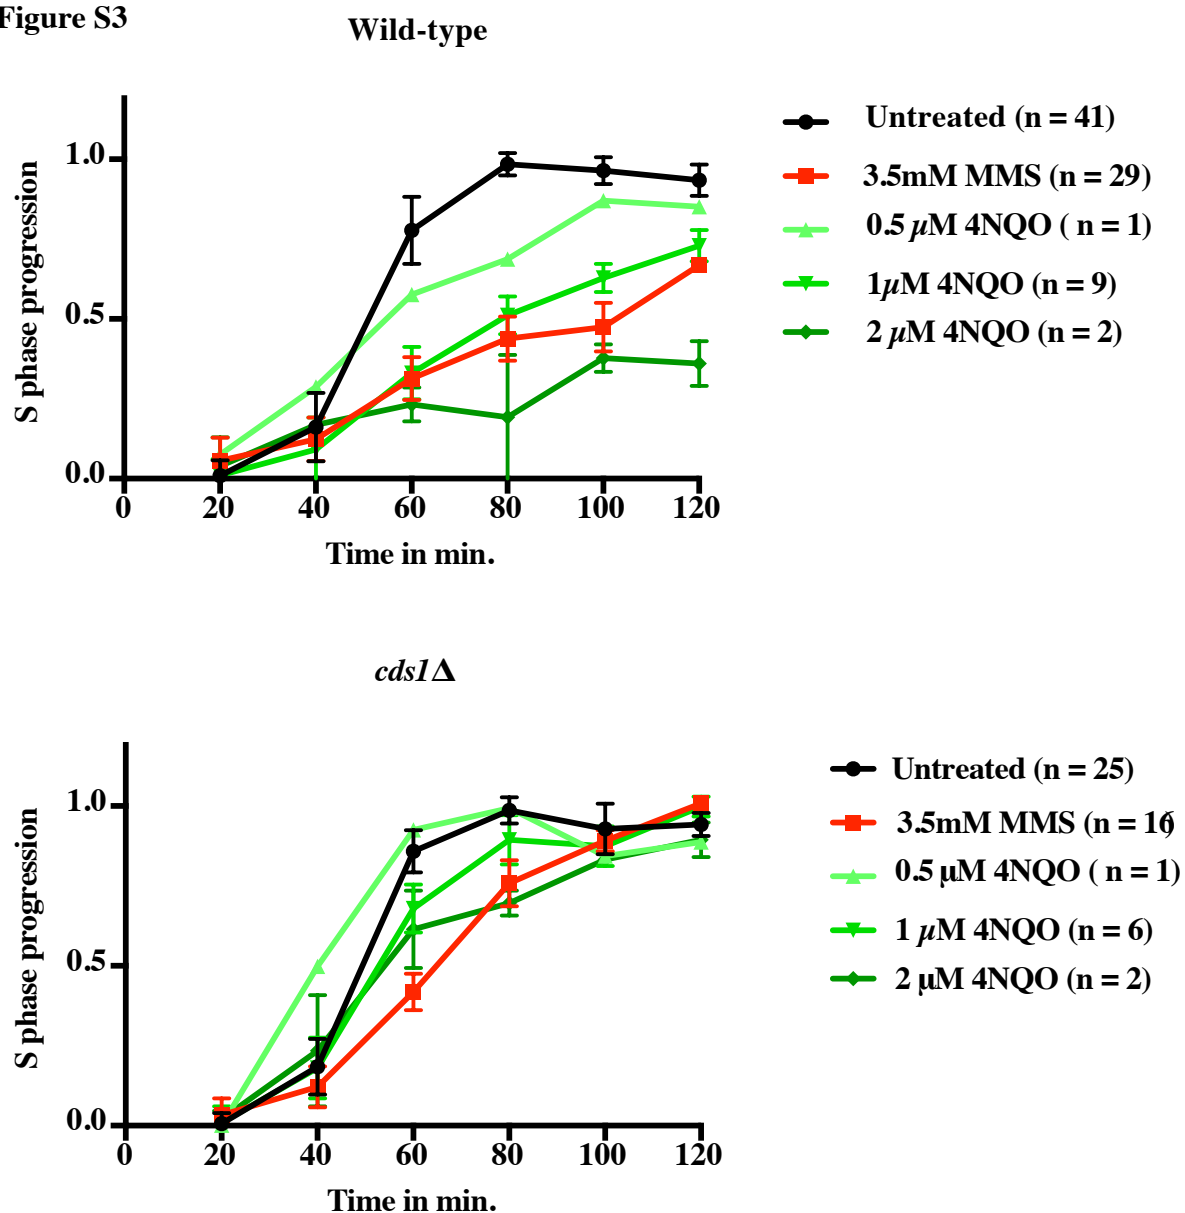

**Figure S3: Titration of 4NQO.** Wild-type (ySF940) and *cds1Δ* (yFS941) cells were synchronized and released into S phase with 3.5 mM MMS, 0.5  $\mu$ M, 1  $\mu$ M, 2  $\mu$ M 4NQO or left untreated. S-phase progression was monitored by taking samples every 20 minutes for flow cytometry.
