# Supplementary material for: Replication fork slowing and stalling are distinct, checkpoint-independent consequences of replicating damaged DNA
Source: PubMed Central journal article supplement (PMC5570505; doi:10.1371/journal.pgen.1006958), 2017-08-14
Supplement: pgen.1006958.s004.pdf [file pgen.1006958.s004.pdf]

Figure S4

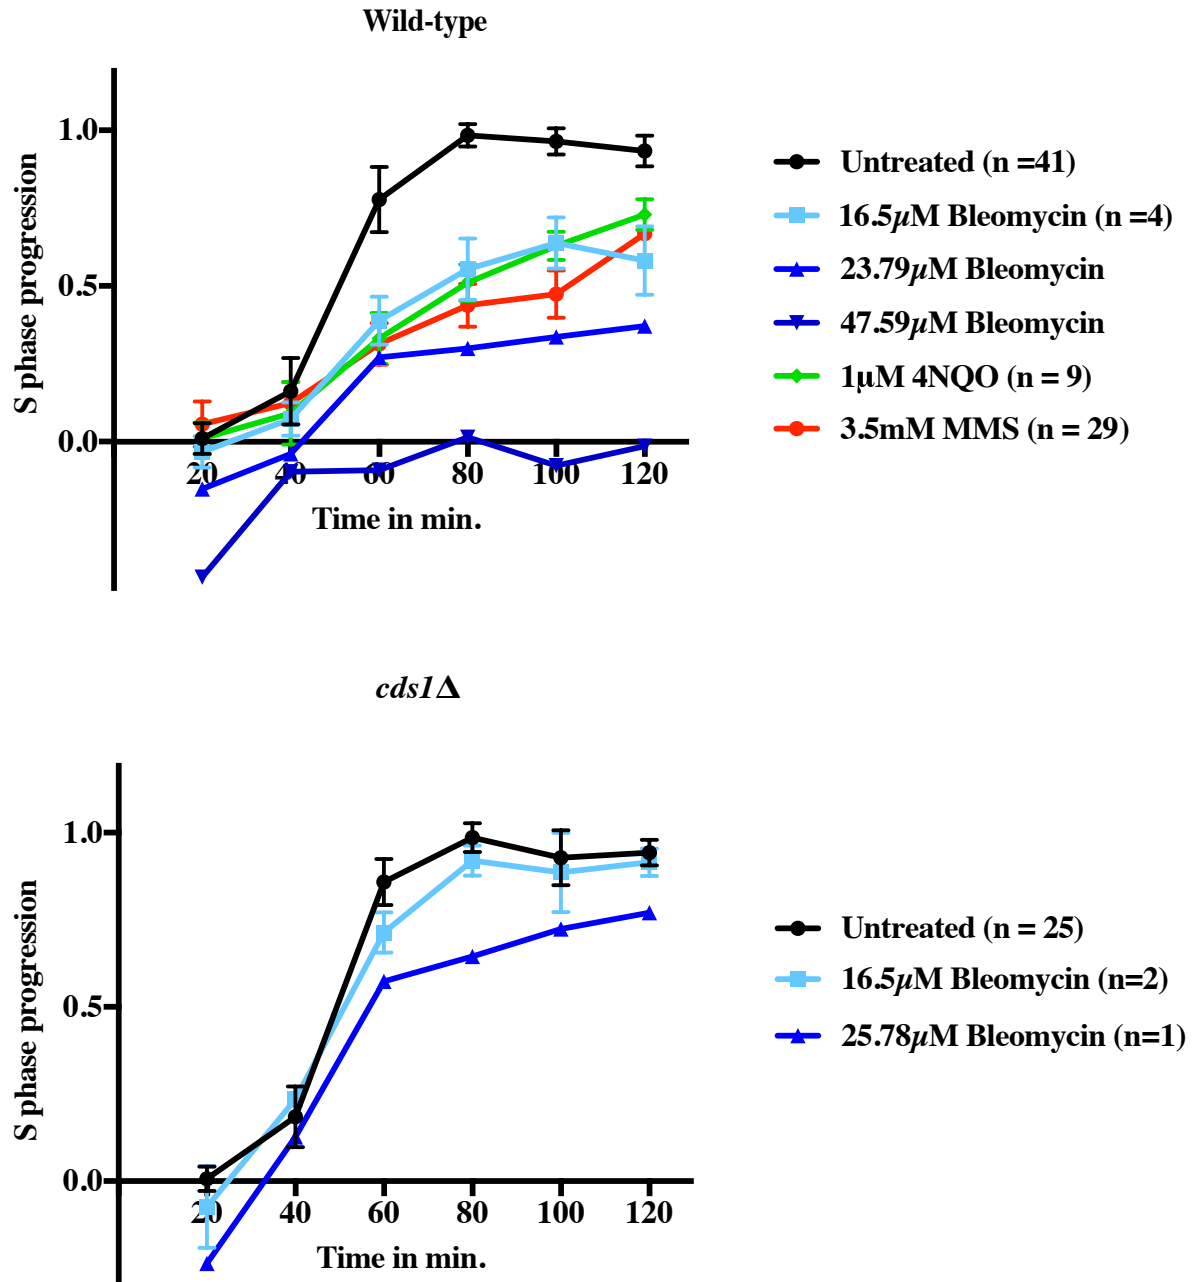

**Figure S4: Titration of Bleomycin.** Wild-type (yFS940) and *cds1* $\Delta$  (yFS941) cells were synchronized and released into S phase with different concentrations of bleomycin 16.5  $\mu$ M, 23.79  $\mu$ M, 47.9  $\mu$ M or left untreated. S phase progression was monitored by taking samples every 20 minutes for flow cytometry.
