# Supplementary material for: Replication fork slowing and stalling are distinct, checkpoint-independent consequences of replicating damaged DNA
Source: PubMed Central journal article supplement (PMC5570505; doi:10.1371/journal.pgen.1006958), 2017-08-14
Supplement: pgen.1006958.s006.pdf [file pgen.1006958.s006.pdf]

Figure S6

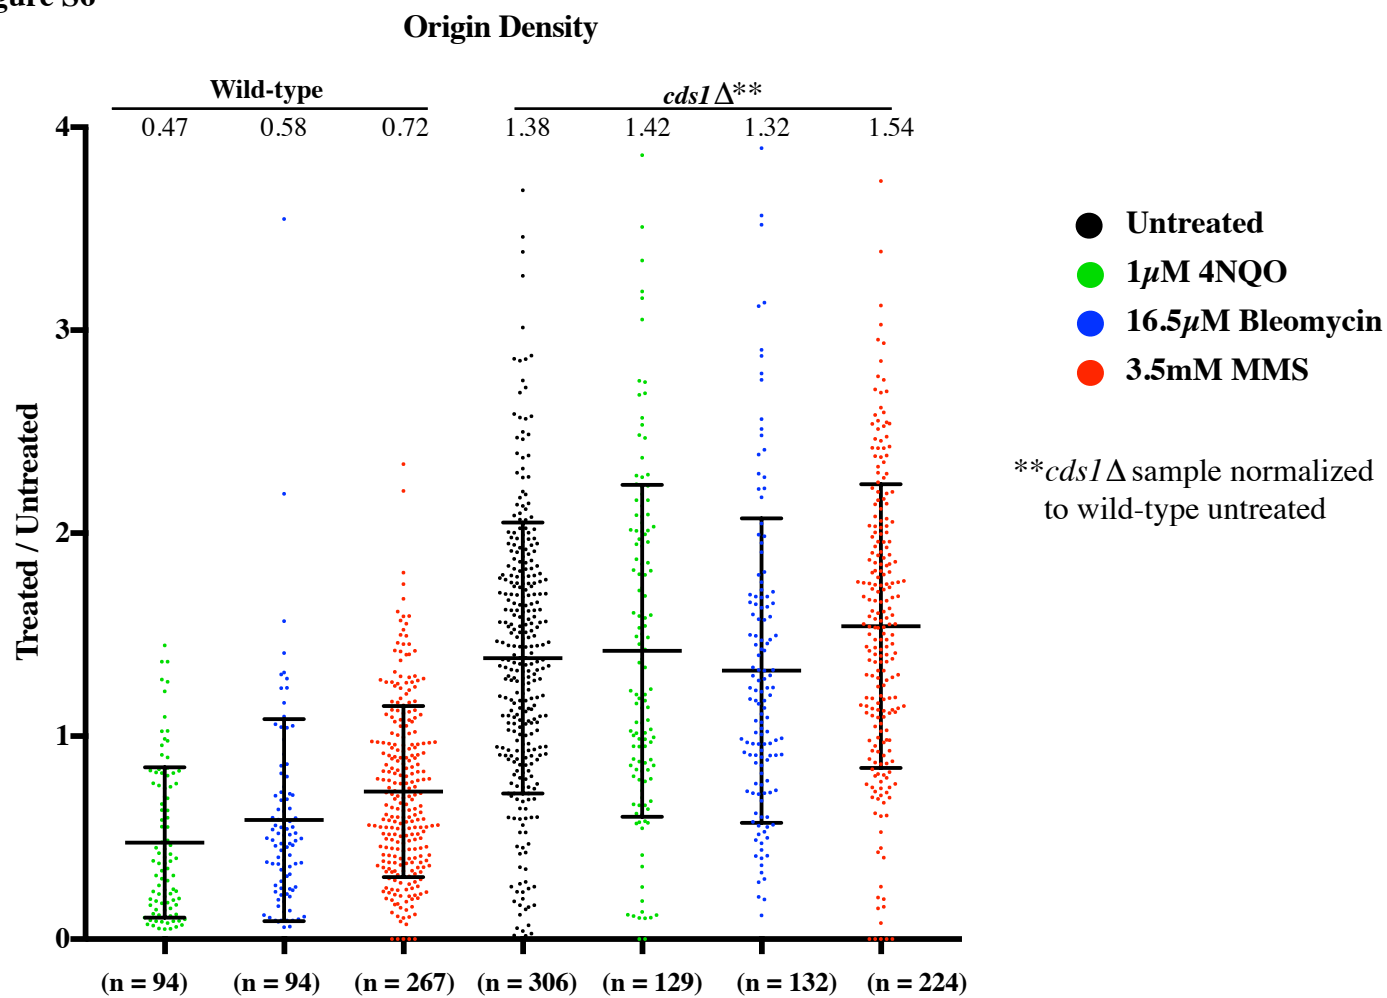

Figure S6: Origin density from *cds1Δ* sample normalized to wild-type untreated sample.
