# Supplementary material for: Replication fork slowing and stalling are distinct, checkpoint-independent consequences of replicating damaged DNA
Source: PubMed Central journal article supplement (PMC5570505; doi:10.1371/journal.pgen.1006958), 2017-08-14
Supplement: pgen.1006958.s007.pdf [file pgen.1006958.s007.pdf]

Figure S7

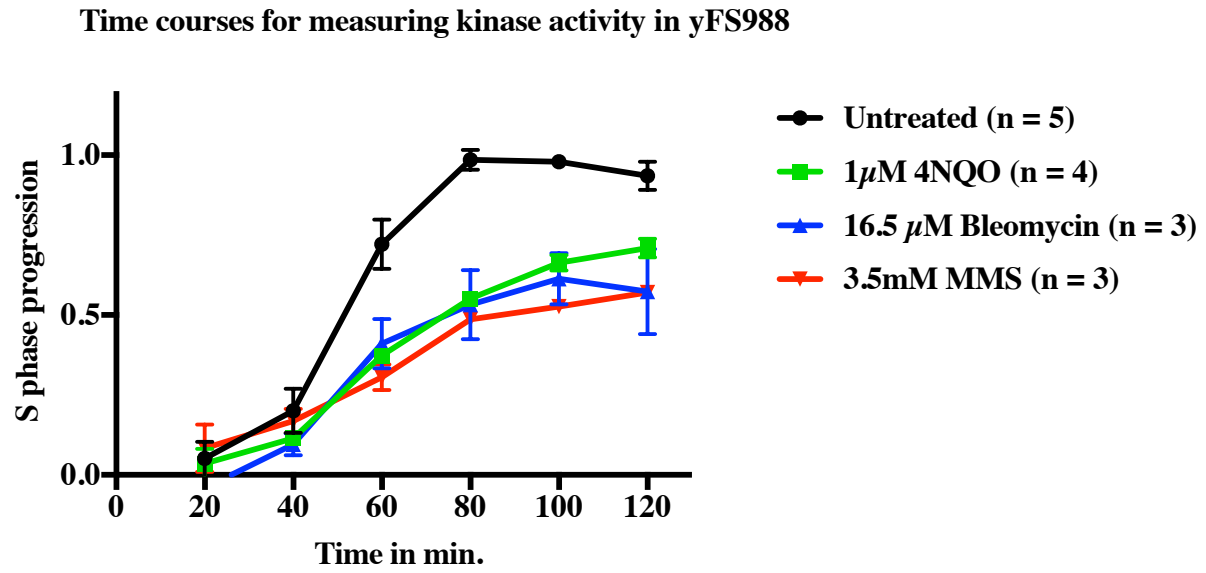

Figure S7: S phase progression by FACS of time courses used for kinase activity measurement
