# Supplementary material for: Replication fork slowing and stalling are distinct, checkpoint-independent consequences of replicating damaged DNA
Source: PubMed Central journal article supplement (PMC5570505; doi:10.1371/journal.pgen.1006958), 2017-08-14
Supplement: pgen.1006958.s009.pdf [file pgen.1006958.s009.pdf]

**Figure S9**

**A Wild-type - fork rate distribution in untreated, MMS samples at time point 1**

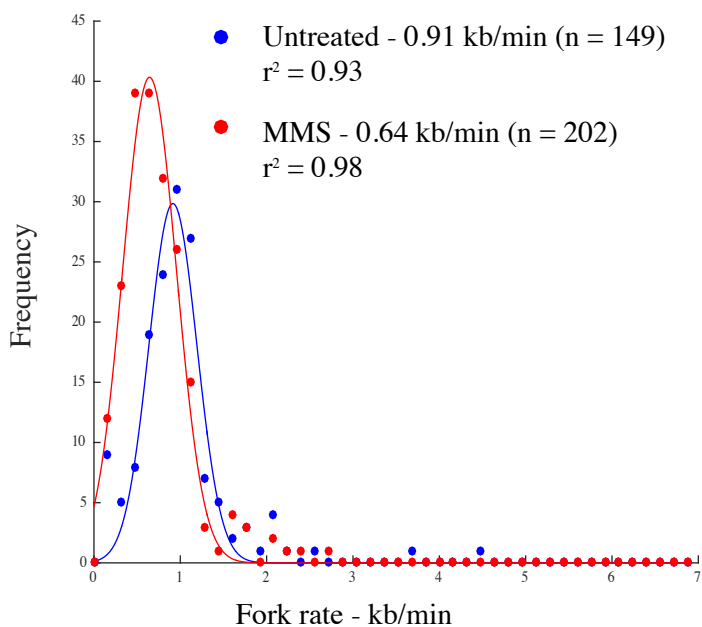

**B Wild-type - fork rate distribution in untreated, MMS samples at time point 2**

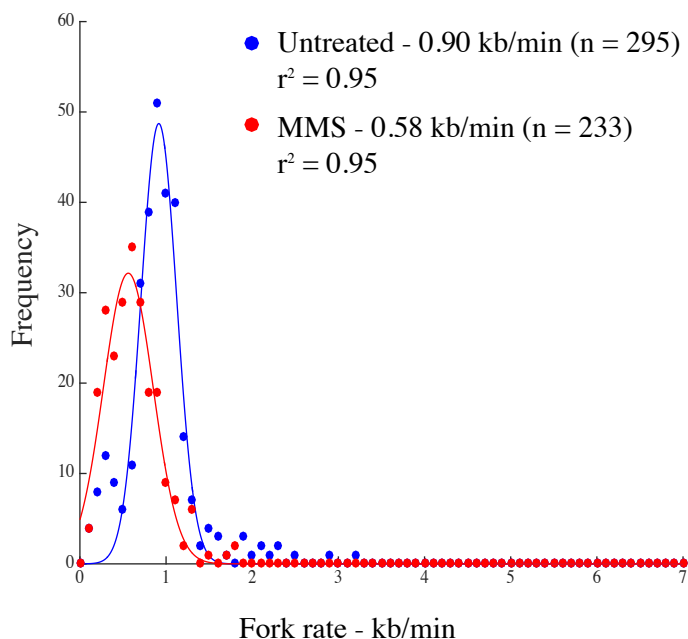

**C *cds1Δ* - fork rate distribution in untreated, MMS samples at time point 3**

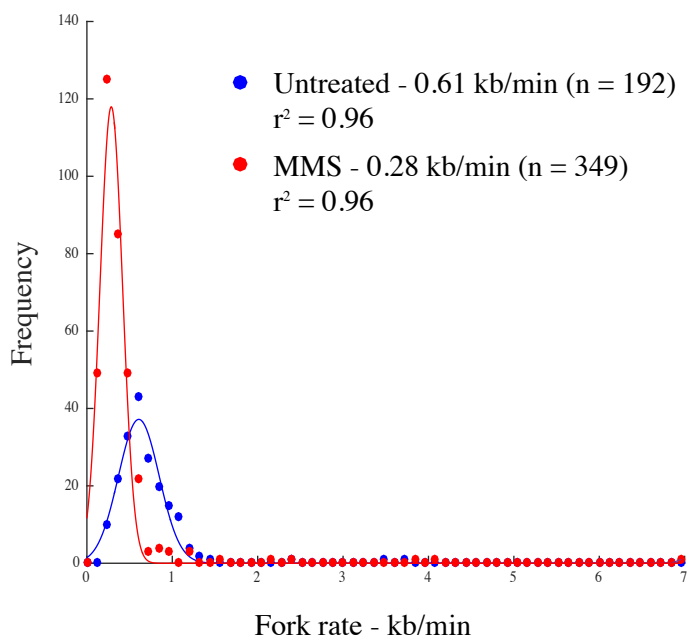

**D *cds1Δ* - fork rate distribution in untreated, MMS samples at time point 4**

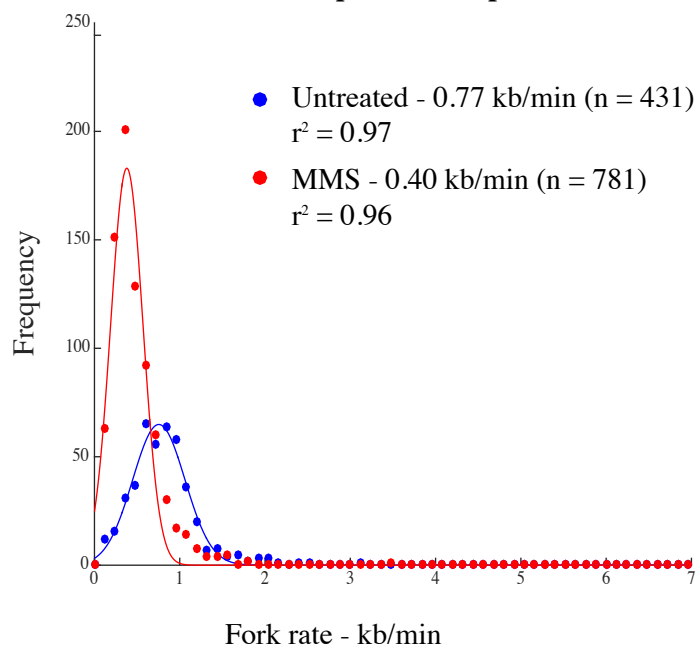

**Figure S9: Fork rate distribution.** Fork rate distribution in wild-type and *cds1Δ* cells untreated or treated with MMS from a single experiment at time points 1 and 3, respectively (A and C) and from two experiments at time points 2 and 4, respectively (B and D). For the exact timings refer to Table S1. Each distribution of fork rate was fit to a Gaussian curve. Mean fork rate was obtained from the fit.
