# Supplementary material for: Replication fork slowing and stalling are distinct, checkpoint-independent consequences of replicating damaged DNA
Source: PubMed Central journal article supplement (PMC5570505; doi:10.1371/journal.pgen.1006958), 2017-08-14
Supplement: pgen.1006958.s012.pdf [file pgen.1006958.s012.pdf]

Figure S12

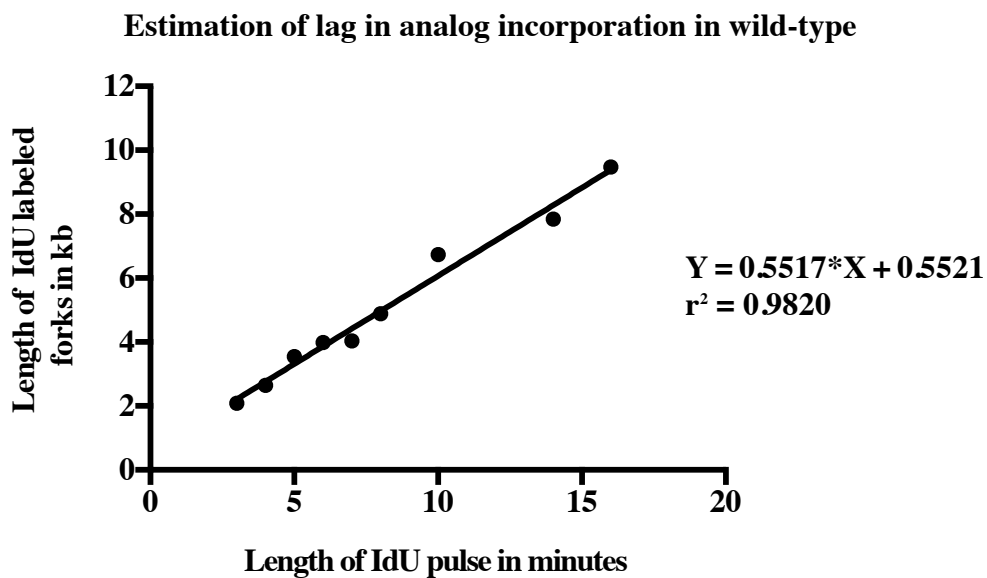

**Figure S12: Estimation of lag in analog incorporation.** Cells were pulse labeled with 2  $\mu\text{M}$  CldU for 5 minutes and chased with 20  $\mu\text{M}$  IdU for varying lengths of time: 3, 4, 5, 6, 7, 8, 10, 14, 16 minutes. At least 100 forks were collected for each time point except for 3 and 4 minutes of IdU labeling for which only 11 and 44 forks were measured, respectively, due to lack IdU labeled forks at such short lengths of labeling period.
